# Supplementary material for: Thrombophilia and Immune-Related Genetic Markers in Long COVID
Source: MDPI journal article supplement (doi:10.3390/v15040885), 2023-03-30
Supplement: s1 [file s1]

**Supplementary table S1.** Genotypic and allelic frequencies of genetic markers in relation to acute COVID-19 (NLC), Long COVID-19 patients (LC) and in Belém (BEL; prior the pandemics).

| Gene         | Genotypes and Alleles | Frequency (%) |                            |                | P*             |
|--------------|-----------------------|---------------|----------------------------|----------------|----------------|
|              |                       | Control (BEL) | NLC (Mild or asymptomatic) | LC (Mild ≥ 3m) |                |
| <b>TNFA</b>  |                       | n (497)       | n (79)                     | n (199)        | 0.0808         |
|              | <b>GG</b>             | 390 (78.5%)   | 67 (85%)                   | 183 (92%)      |                |
|              | <b>AG</b>             | 96 (19.3%)    | 12 (15%)                   | 15 (7.5%)      |                |
|              | <b>AA</b>             | 11 (2.2%)     | 0                          | 1 (0.5%)       |                |
|              | <b>A</b>              | 12%           | 7%                         | 4%             |                |
| <b>IFNG</b>  |                       | n (398)       | n (79)                     | n (199)        | <b>0.0332*</b> |
|              | <b>AA</b>             | 226 (56.7%)   | 36 (45.5%)                 | 119 (60%)      |                |
|              | <b>AT</b>             | 147 (37%)     | 30 (38%)                   | 68 (34%)       |                |
|              | <b>TT</b>             | 25 (6.3%)     | 13 (16.5%)                 | 12 (6%)        |                |
|              | <b>T</b>              | 25%           | 35%                        | 23%            |                |
| <b>IL6</b>   |                       | n (300)       | n (79)                     | n (198)        | 0.4081         |
|              | <b>GG</b>             | 207 (69%)     | 47 (59.5%)                 | 129 (65%)      |                |
|              | <b>CG</b>             | 85 (28%)      | 28 (35.5%)                 | 62 (31%)       |                |
|              | <b>CC</b>             | 8 (3%)        | 4 (5%)                     | 7 (4%)         |                |
|              | <b>G</b>              | 83%           | 77%                        | 80%            |                |
| <b>IL6R</b>  |                       |               | n (79)                     | n (199)        | 0.4625         |
|              | <b>AA</b>             | **            | 31 (39%)                   | 59 (30%)       |                |
|              | <b>AC</b>             | **            | 33 (42%)                   | 100 (50%)      |                |
|              | <b>CC</b>             | **            | 15 (19%)                   | 40 (20%)       |                |
|              | <b>C</b>              |               | 40%                        | 45%            |                |
| <b>CD209</b> |                       | n (72)        | n (79)                     | n (199)        | 0.0604         |
|              | <b>AA</b>             | 50 (69.4%)    | 48 (61%)                   | 145 (73%)      |                |
|              | <b>AG</b>             | 19 (26.4%)    | 28 (35%)                   | 49 (25%)       |                |
|              | <b>GG</b>             | 3 (4.2%)      | 3 (4%)                     | 5 (2%)         |                |
|              | <b>G</b>              | 17%           | 21%                        | 15%            |                |

| Gene         | Genotypes and Alleles | Frequency (%) |                            |                | P*             |
|--------------|-----------------------|---------------|----------------------------|----------------|----------------|
|              |                       | Control (BEL) | NLC (Mild or asymptomatic) | LC (Mild ≥ 3m) |                |
| <b>CHTA</b>  |                       |               | n (79)                     | n (199)        | 1.0000         |
|              | <b>AA</b>             | **            | 18 (23%)                   | 39 (19%)       |                |
|              | <b>AG</b>             | **            | 32 (40%)                   | 99 (50%)       |                |
|              | <b>GG</b>             | **            | 29 (37%)                   | 61 (31%)       |                |
|              | <b>A</b>              |               | 43%                        | 44%            |                |
| <b>DPA1</b>  |                       |               | n (79)                     | n (199)        | 0.7893         |
|              | <b>AA</b>             | **            | 37 (47%)                   | 88 (44%)       |                |
|              | <b>AG</b>             | **            | 36 (45%)                   | 91 (46%)       |                |
|              | <b>GG</b>             | **            | 6 (8%)                     | 20 (10%)       |                |
|              | <b>A</b>              |               | 70%                        | 67%            |                |
| <b>DPB1</b>  |                       |               | n (79)                     | n (199)        | 0.5807         |
|              | <b>AA</b>             | **            | 31 (39%)                   | 70 (35%)       |                |
|              | <b>AG</b>             | **            | 41 (52%)                   | 100 (50%)      |                |
|              | <b>GG</b>             | **            | 7 (9%)                     | 29 (15%)       |                |
|              | <b>G</b>              |               | 35%                        | 40%            |                |
| <b>MTHFR</b> |                       | n (478)       | n (79)                     | n (199)        | <b>0.0450*</b> |
|              | <b>CC</b>             | 201 (42%)     | 28 (35%)                   | 98 (49%)       |                |
|              | <b>CT</b>             | 226 (47%)     | 40 (51%)                   | 80 (40%)       |                |
|              | <b>TT</b>             | 51 (11%)      | 11 (14%)                   | 21 (11%)       |                |
|              | <b>T</b>              | 34%           | 39%                        | 31%            |                |
| <b>FV</b>    |                       | n (127)       | n (79)                     | n (198)        | 0.3218         |
|              | <b>GG</b>             | 123 (97%)     | 77 (97.5%)                 | 196 (99%)      |                |
|              | <b>AG</b>             | 4 (3%)        | 2 (2.5%)                   | 2 (1%)         |                |
|              | <b>AA</b>             | 0             | 0                          | 0              |                |
|              | <b>A</b>              | 1.6%          | 1.2%                       | 0.5%           |                |

SNPs genotype and allele frequencies in the population of Belém could be obtained from studies conducted before the COVID-19 pandemics: *TNFA* and *IFNG* [17–21], *MTHFR* and *F5* [22], *IL6* [23], *CD209* [24]. \*Analysis between NLC and LC groups (Fisher's exact test). \*\* No data available in literature.
